# Supplementary figures and images for: Necroptosis is preceded by nuclear translocation of the signaling proteins that induce it
Source: PubMed Central journal article supplement — Cell Death Differ. 2015 Jul 17;23(2):253–60. doi: 10.1038/cdd.2015.92 (PMC4716306; doi:10.1038/cdd.2015.92), 2015-07-17

Supplementary Figure S1

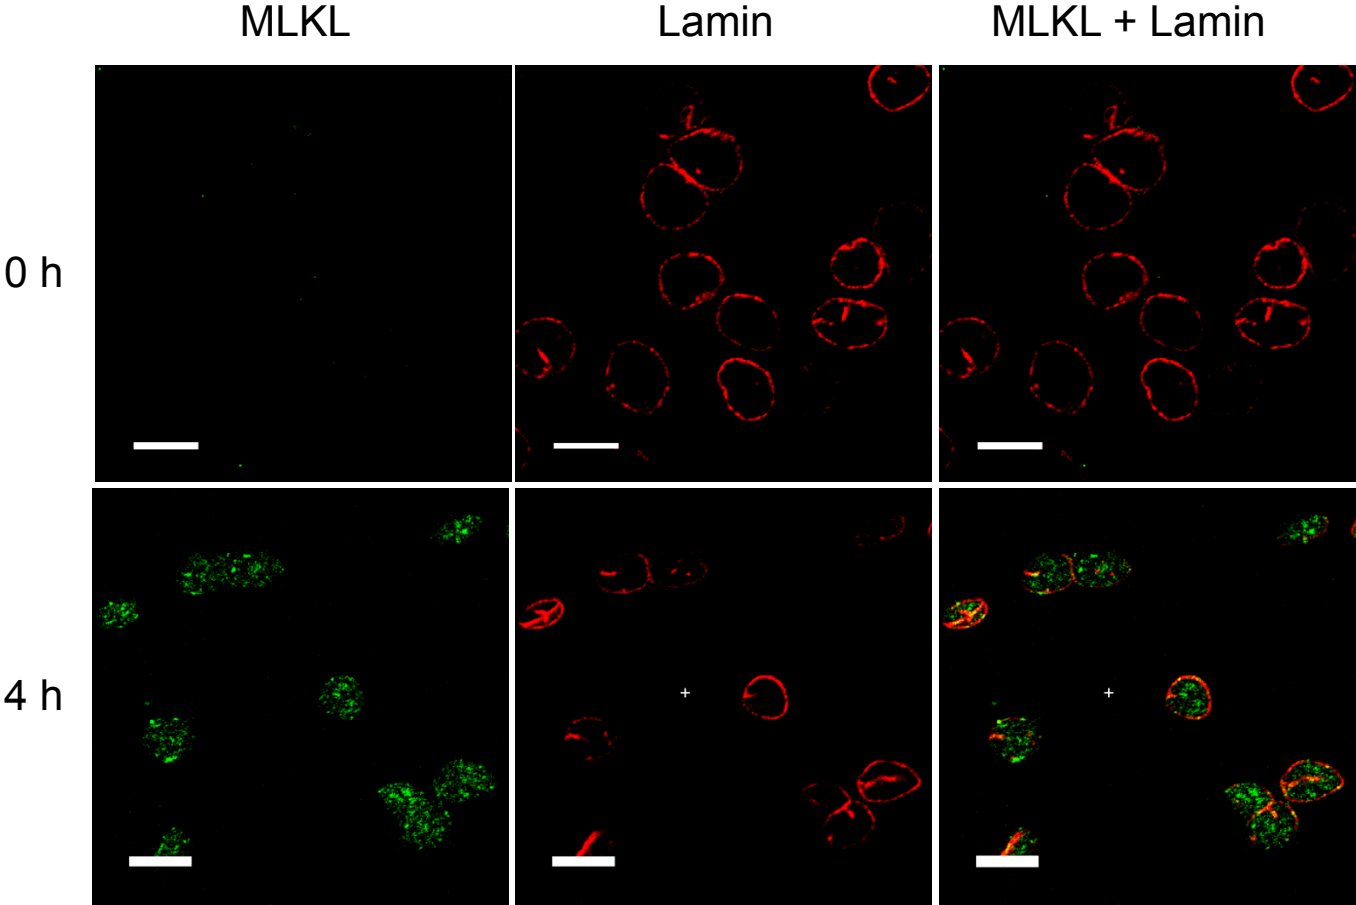

Supplement: cdd201592x3.pdf [file cdd201592x3.pdf]

# Supplementary Figure S2

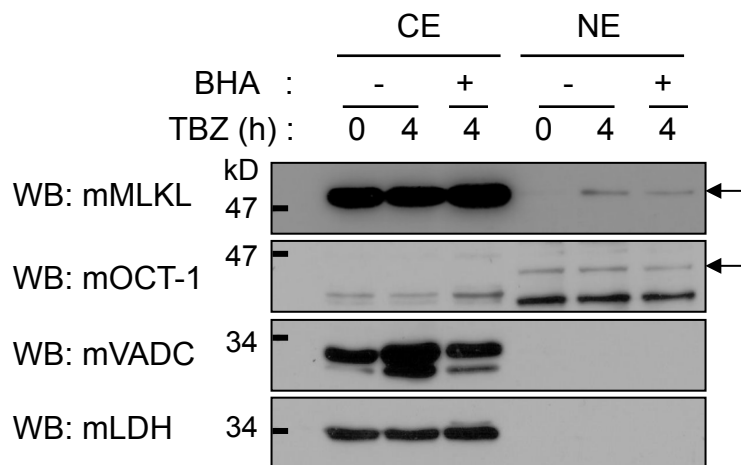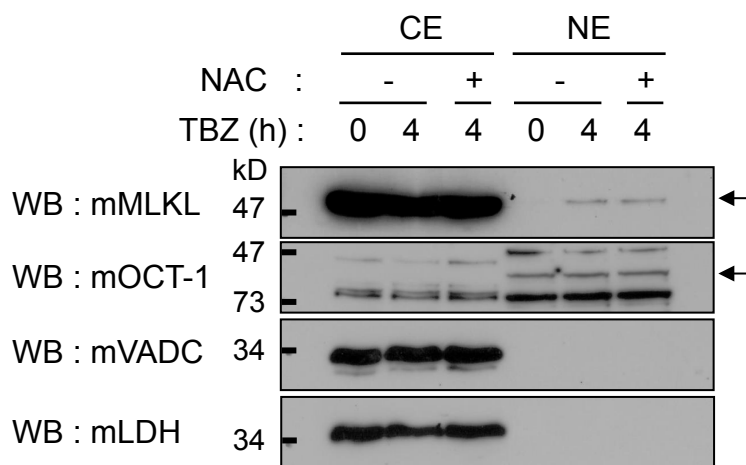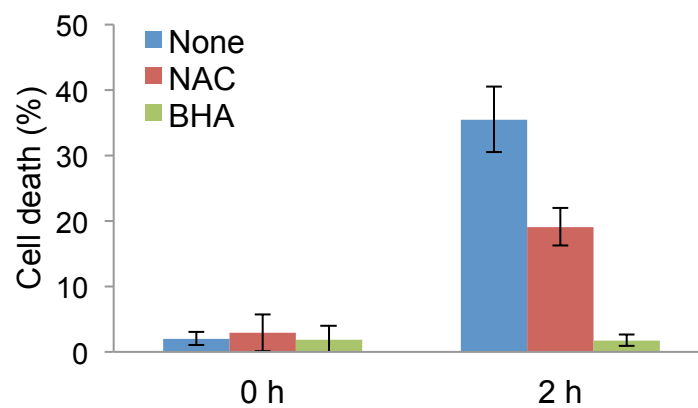

Supplement: cdd201592x4.pdf [file cdd201592x4.pdf]

Supplementary Figure S3

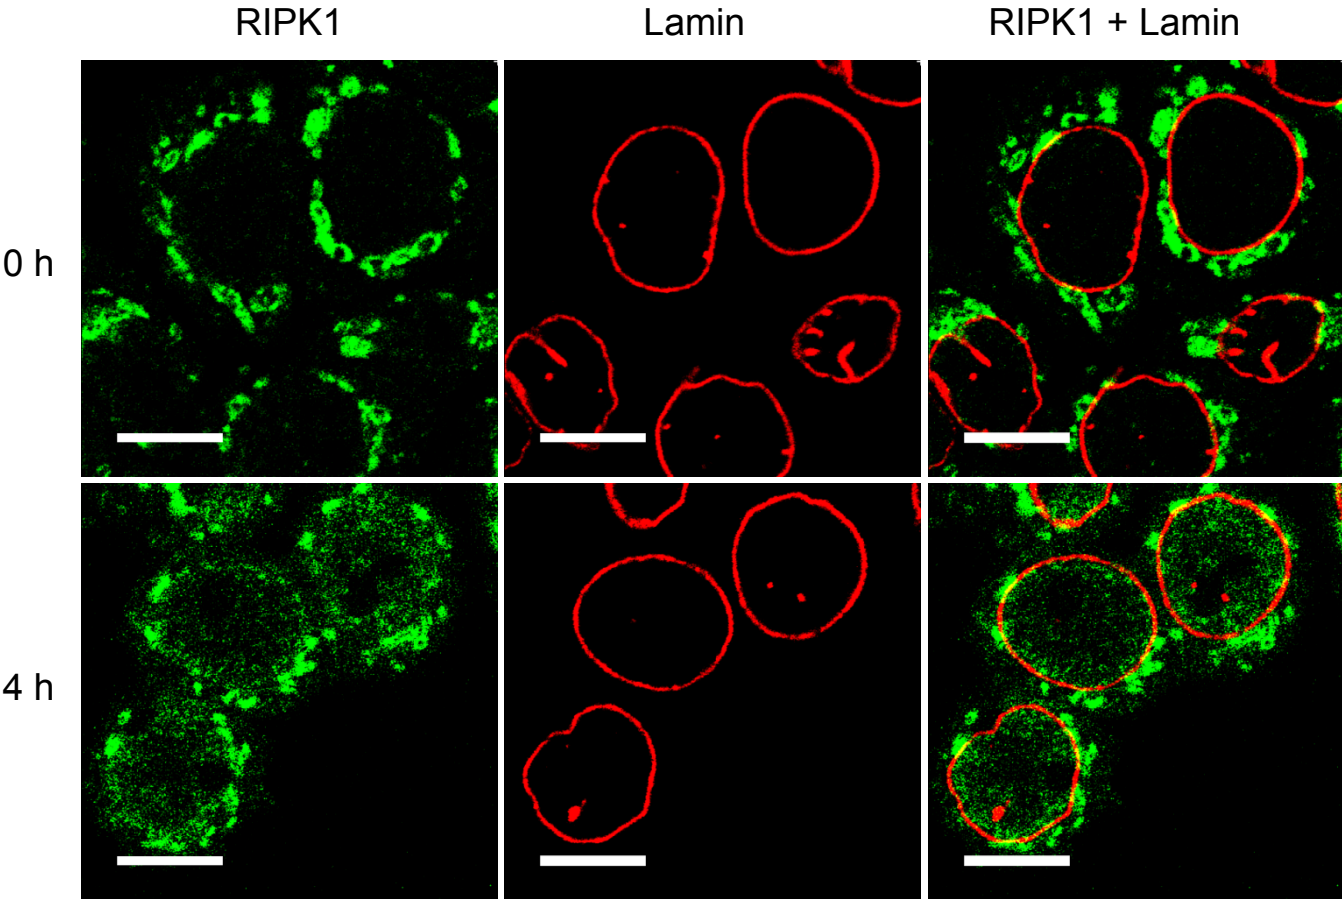

Supplement: cdd201592x5.pdf [file cdd201592x5.pdf]

# Supplementary Figure S4

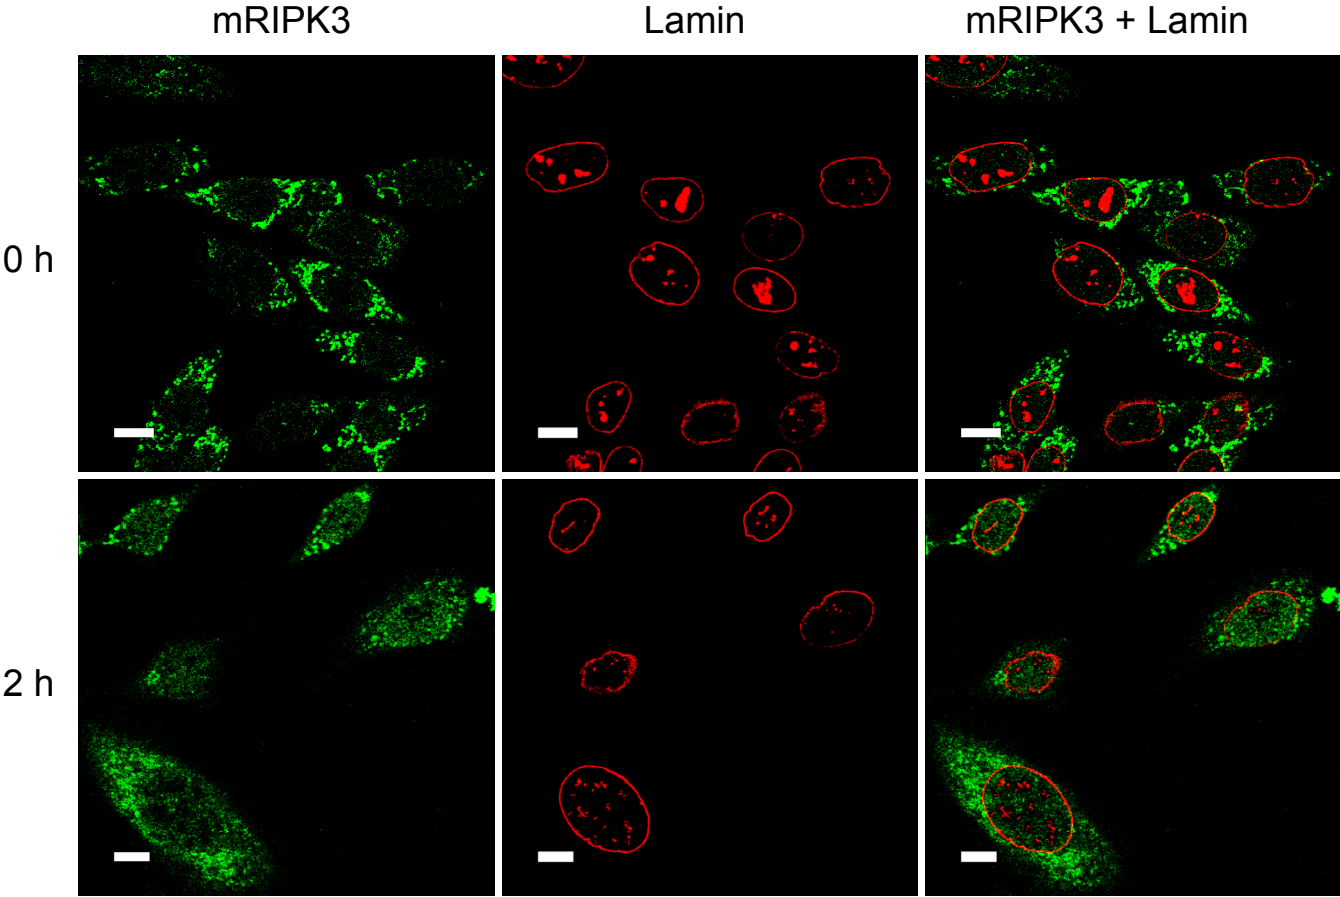

Supplement: cdd201592x6.pdf [file cdd201592x6.pdf]

# Supplementary Figure S5

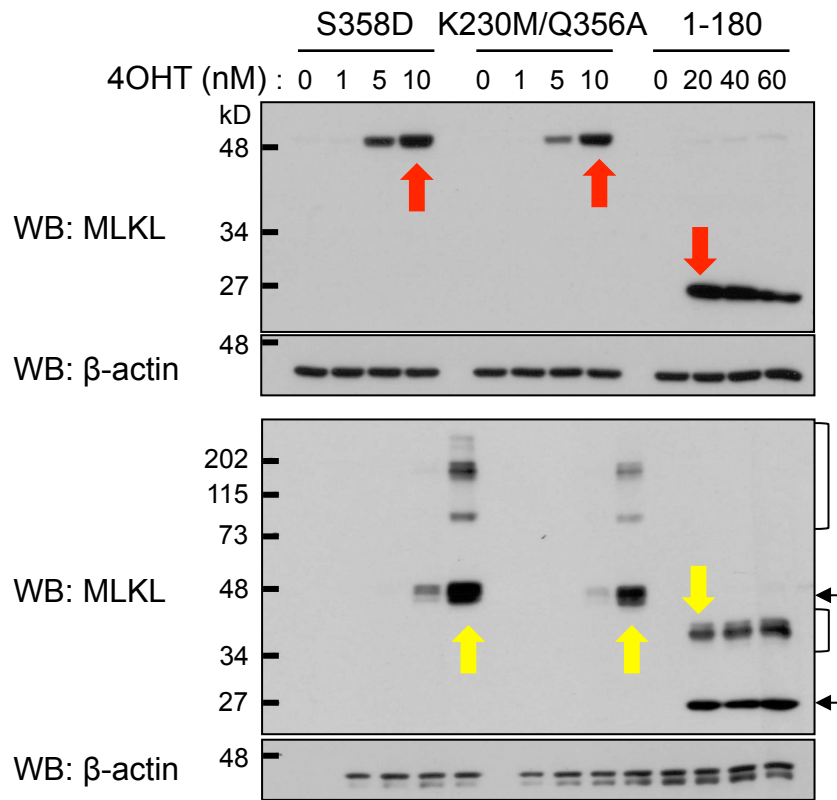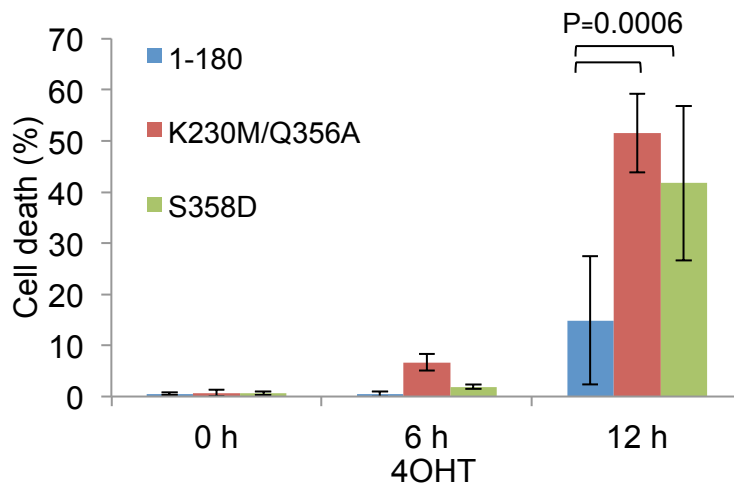

Supplement: cdd201592x7.pdf [file cdd201592x7.pdf]
